# Supplementary material for: Cervical and breast cancer screening participation and utilisation of maternal health services: a cross-sectional study among immigrant women in Southern Italy
Source: PubMed Central journal article supplement — BMJ Open. 2017 Oct 15;7(10):e016306. doi: 10.1136/bmjopen-2017-016306 (PMC5652469; doi:10.1136/bmjopen-2017-016306), 2017-10-15
Supplement: bmjopen-2017-016306supp001.pdf [file bmjopen-2017-016306supp001.pdf]

- Hepatitis C       Tuberculosis       Parasitosis (es. malaria, toxoplasmosis, giardia, schistosomiasis, taenia, ecc.)  
 STD (eg. syphilis, gonorrhea, HSV, etc.)       Other (*please, specify* \_\_\_\_\_)

### C) Health risk habits

**C.1. Tobacco use**

C.1.1. Have you smoked at least 100 cigarettes in your entire life?       No (→C.2.1.)       Yes

C.1.2. Do you now smoke cigarettes:       Some days (*specify n°* )       Every day (*specify n°* )       Never (→C.2.1.)

C.1.3. During the past 12 months, have you stopped smoking for one day or longer because you were trying to quit smoking?       No       Yes

**C.2. Alcohol consumption**

C.2.1. During the past 30 days, did you have at least one drink of any alcoholic beverage such as beer, wine or liquor?       No (→D.1.)       Yes

C.2.2. During the past 30 days, how many days per month did you have at least one drink of any alcoholic beverage?     

C.2.3. During the past 30 days, on the days when you drank, approximately how many drinks did you drink on average?

Wine            Beer            Liquor     

### D) Prevention and screening

**D.1. Immunization**

**D.1.1. Which of the following vaccinations have you had? (more than one option allowed)**

Diphtheria       Tetanus       Pertussis       Polio  
 Hepatitis B       Mumps       Rubella       Measles  
 Chicken pox       Haemophilus B       Pneumococcal       Meningococcal  
 Influenza       None/I don't know       Other (*please, specify* \_\_\_\_\_)

*(If participant answered Yes to the question A.3.2. skip to question D.1.2.. If participant answered No to the question A.3.2. skip to question D.2.1.)*

**D.1.2. Have your children received vaccinations included in the national programs?**       No       I don't remember       Yes (→D.1.4.)

**D.1.3. Why have they not received children's vaccinations? (more than one option allowed)**

I was not aware of their availability       Vaccinations are not useful       Vaccinations are dangerous  
 Religious reasons       Lack of time       Other (*please, specify* \_\_\_\_\_)

**D.1.4. Do you remember which of the following vaccinations your children have had?**

Mandatory vaccinations (diphtheria, tetanus, polio, hepatitis B)       Pertussis       Measles, mumps and rubella  
 Chicken pox       Haemophilus B       Pneumococcal       Meningococcal  
 Influenza       None/I don't know       Other (*please, specify* \_\_\_\_\_)

**D.2. Screening**

**D.2.1. Have you ever had Pap test?**

No       Yes, for control       Yes, for problems

**D.2.2. When was the last time you had a Pap test? (years)**

<1 yr ago       1-2 yrs ago       2-3 yrs ago       3-5 yrs ago       ≥5 yrs ago

**D.2.3. Have you had a hysterectomy?**       No       Yes

**D.2.4. Have you ever had a mammography?**

No       Yes, for control       Yes, for problems

**D.2.5. When was the last time you had a mammography? (years)**

<1 yr ago       1-2 yrs ago       2-3 yrs ago       3-5 yrs ago       ≥5 yrs ago

### E) Utilization of maternal health services

*(If participant answered Yes to question A.3.1. skip to question E.1.. If participant answered No to question A.4.1. end interview.)*

**E.1. How many times have you given birth since you've been in Italy?**       None       (*spec. n°*)

**E.2. How many times have you had a miscarriage?**       None       I don't remember       (*spec. n°*)

**E.3. How many times have you had an abortion?**       None       I don't remember       (*spec. n°*)

*(If participant answered None to question E.1. end interview. Otherwise, complete interview with all following questions referred to last pregnancy.)*

**E.4. Who was mainly monitoring your pregnancy/ies?**       None       General practitioner  
 Gynecologist       Midwife       Other (*please, specify* \_\_\_\_\_)

**E.5. How many prenatal visits did you attend during each pregnancy?**

- None  1  >1 (*spec. n°*)
- E.6. When did you receive your first pregnancy appointment?**  I don't remember  (*please, specify weeks of pregnancy*)
- E.7.1. How many prenatal ultrasound checks did you have during your pregnancy?** (*spec. n°*)
- E.7.2. Do you remember in which weeks of pregnancy you had these prenatal ultrasound checks?** (*more than one option allowed*)  None
- <8  8-12  13-16  17-20  21-24  25-28  29-32  ≥33
- E.8. Did you know that prenatal visits and ultrasound checks are free?**  No  Yes
- E.9. Did you have any prenatal diagnostic testing?** (*max. 4 options*)  No  Yes, maternal serum markers
- Yes, chorionic villus sampling  Yes, amniocentesis  Yes, nuchal translucency  Other (*please, specify* \_\_\_\_\_)
- E.10. Have you ever participated in a prepartum course/prenatal class?**  No  Yes
- E.11. Overall, do you believe you have had difficulties of access to and use of prenatal services during your pregnancy?** (*max. 3 options*)  No
- Yes, I don't know system's organization  Yes, for language barriers  Yes, for long waiting times for access to health-care services
- Yes, lack of time  Yes, for my poor socioeconomic situation  Other (*please, specify* \_\_\_\_\_)
- E.12. Did you ever smoke during pregnancy?**  No, I don't smoke  No, I stopped
- Yes, I continued to smoke the same number of cigarettes  Yes, but I decreased the number of cigarettes
- E.13. Did you have a postnatal visit within 12 months after delivery?**  No  Yes
- E.14. What was your chosen infant feeding method?**  Breastfeeding only (→E.17.)  Bottle-feeding only
- Breastfeeding and other (water, tisane, or other infusion)  Breastfeeding and bottle-feeding
- E.15. Who advised you regarding the formula milk?**  Nobody, I decided  Pediatrician
- Family/Friends  Physician of hospital ward  Other (*please, specify* \_\_\_\_\_)
- E.16. What is the reason for the formula milk?** (*max. 3 options*)  I don't have enough milk  I stopped breastfeeding
- The baby was not gains weight  The baby couldn't latch on well
- I had painful nipples, and/or mastitis  I had acute health problems  My child had acute health problems
- I had to resume work shortly  I had to moved my child abroad  I was tired
- I took some drugs (*please, specify* \_\_\_\_\_)  Other (*please, specify* \_\_\_\_\_)
- E.17. Who gave you information about infant feeding?**  None  I know
- Midwife of hospital ward  Midwife of family planning center  Pediatrician  Family/Friends
- Other (*please, specify* \_\_\_\_\_)
- E.18. Do you believe it is possible to get pregnant during the period of breastfeeding?**
- No, it's not possible  I don't know  Yes, it's possible
- E.19. Who counseled you on postpartum contraceptive methods?**
- None (→E.21.)  Family/Friends  General practitioner
- Specialist  Midwife of family planning center  Other (*please, specify* \_\_\_\_\_)
- E.20. Do you believe this counseling has been sufficient?**
- Yes, I believe it has  No, I would like to know more
- E.21. At the resumption of sexual relations, are you thinking of using contraception?**
- No  I don't know yet  Yes (*please, specify* \_\_\_\_\_)
- E.22. Do you know a family planning center?**
- No (→E.24.)  Yes, but I never used it  Yes, I have used it (→ E.24.)
- E.23. Why have you never used a family planning center?** (*please, specify one or more reason*) \_\_\_\_\_
- 
- E.24. Are you accessing any healthcare services since discharge?**  No (→E.26.)  Yes
- E.25. Please, specify one or more of following healthcare services:**
- Pediatric planning center  Family planning center  Advice center  Specialist clinic
- Emergency Department  Hospital  Other (*please, specify* \_\_\_\_\_)
- E.26. Whom have you selected as the child's physician?**  None  Specialist
- Physician of family planning center  Physician of hospital ward  Pediatrician  Other (*please, specify* \_\_\_\_\_)
